# Supplementary material for: Design and synthesis of fluorene-based block polymer host materials for efficient electroluminescence
Source: Royal Society of Chemistry journal article supplement (doi:10.1039/d5nj00333d), 2025-01-01
Supplement: d5nj00333d1.pdf [file d5nj00333d1.pdf]

## Design and synthesis of fluorene-based block polymer host materials for efficient electroluminescence

Youqiang Qian<sup>†, a</sup>, Wenhao Zhang<sup>†, a</sup>, Ming Pei<sup>a</sup>, Na Hu<sup>c</sup>, Junyi Chen<sup>a</sup>, Shilong Feng<sup>a</sup>, Yanjiao Chang<sup>\*, a</sup>, Yinghong Liu<sup>a</sup>, Jingjing Wan<sup>\*, b</sup>, Xinxin Ban<sup>\*, a</sup>

<sup>a</sup> School of Environmental and Chemical Engineering, Jiangsu Ocean University, Lianyungang 222005

<sup>b</sup> Jiangsu Jerry Technology Group Co. Ltd. Lianyungang 222005

<sup>c</sup> Nanjing Tech University Lianyungang Institute of Industrial Technology. Lianyungang 222005

<sup>†</sup> Contributed equally

\*Corresponding Authors Email: changyj@jou.edu.cn; youzigaoxing@163.com; banxx@jou.edu.cn

### Main Experimental Reagents and Testing Instruments

In the experiment, all reactants such as 4-hydroxycarbazole, bisphenol fluorene, benzophenone, cesium carbonate, potassium carbonate, silica gel, etc., were purchased and used directly. Reagents such as dimethyl sulfoxide (DMSO), 1,6-dibromohexane, acetone, ethanol, etc., were also used directly otherwise specified. Other solvents like petroleum ether and dichloromethane were purchased as analytical grade and used directly.

Testing Instruments: <sup>1</sup>H and <sup>13</sup>C NMR spectra were recorded on a Bruker AVANCE 500 spectrometer. The glass transition temperature (T<sub>g</sub>) of samples was measured using a DSC 2910 differential scanning calorimeter at a heating rate of 10 °C min<sup>-1</sup> under an N<sub>2</sub> atmosphere. A UV-2450 UV-Visible spectrophotometer was used to measure absorption intensity and transmittance of samples; fluorescence emission spectra in solution state were measured using a HORIBA FLUOROMAX-4 fluorescence spectrophotometer. Cyclic voltammetry (CV) was conducted using a voltammetry analyzer with a glassy carbon working electrode, a platinum wire counter electrode, and a silver wire reference electrode. The excitation energies of singlet and triplet states were obtained using the TD-DFT method based on optimized ground-state molecular structures. For solution measurements, all samples were prepared at a concentration of 10<sup>-5</sup> M in toluene. For thin film measurements, the films were spin-coated from 15 mg/mL solutions in 1,2-dichloroethane onto pre-cleaned quartz substrates at 2000 rpm, resulting in uniform films with thickness of 80. The excitation wavelength was 350 nm for all PL measurements, with slit widths of 5 nm for both excitation and emission monochromators. All quantum chemical calculations were performed using the Gaussian 09 software package. Geometry optimization was carried out using the B3LYP functional with the 6-31G(d,p) basis set. Low-lying excited singlet and triplet states were computed using the optimized structures with time-dependent density functional theory (TD-DFT) at the same level.

### Preparation and Characterization of OLED Devices

The preparation process can be briefly described as follows: First, the glass substrates coated with ITO were rinsed with deionized water, followed by ultrasonic treatment in acetone, ethanol, and isopropanol sequentially. Before device fabrication, the substrates were treated in a UV-ozone oven for 20 minutes. The hole transport layer (PEDOT:PSS) was then spin-coated onto the ITO substrate at a speed of 3000 rpm and annealed at 150 °C for 10 minutes. Subsequently, the substrate was transferred to a nitrogen glove box, where a 1,2-dichloroethane solution containing the emissive layer was spin-



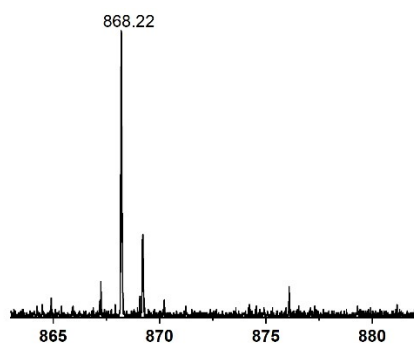

**Fig. S3** MS spectra of 4,4'-((((9H-fluorene-9,9-diyl)bis(4,1-phenylene))bis(oxy))bis(hexane-6,1-diyl))bis(oxy))bis(9H-carbazole)(M<sub>2</sub>)

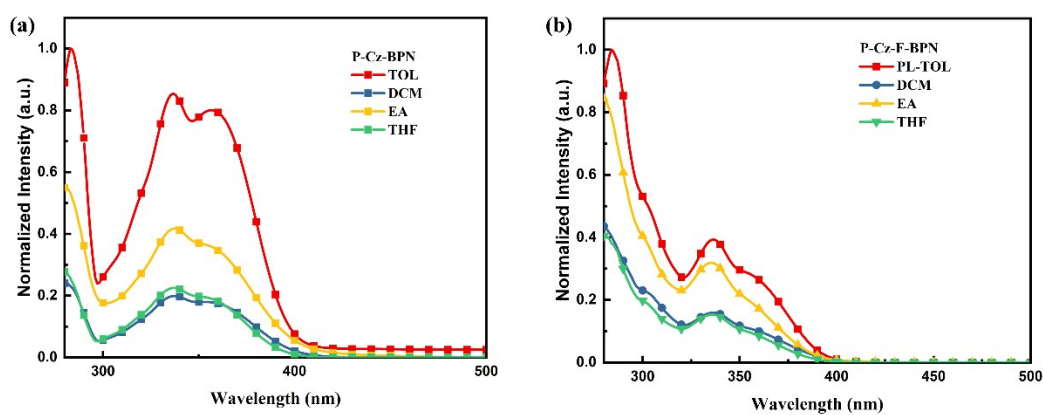

**Fig S4** UV-Vis absorption spectra of P-Cz-BPN (a) and P-Cz-F-BPN (b) in different solvents

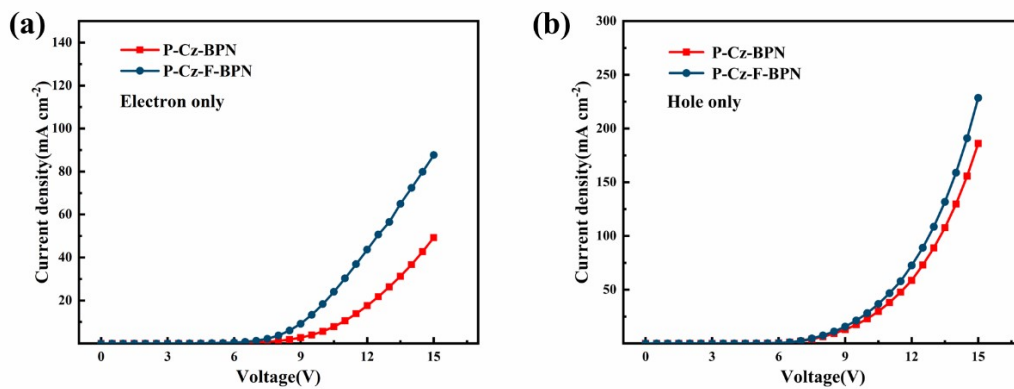

**Fig S5** The hole-only and electron-only devices of P-Cz-BPN and P-Cz-F-BPN
